# Supplementary material
Source: MDPI journal article supplement (https://www.mdpi.com/1424-2818/14/12/1076)
Supplement: s1 [file s1]

**Table S1.** Location of the eastern sarus crane in the Ayeyarwady Delta, the Union of Myanmar, in the summer season, the rainy season, and the winter season.

| Species                     | x         | y           | Latitude | longitude | Season |
|-----------------------------|-----------|-------------|----------|-----------|--------|
| <i>Antigone. a. sharpii</i> | 726,204.5 | 1,862,596.9 | 16.8     | 95.1      | winter |
| <i>Antigone. a. sharpii</i> | 729,994.8 | 1,894,288.2 | 17.1     | 95.2      | winter |
| <i>Antigone. a. sharpii</i> | 736,966.5 | 1,857,991.3 | 16.8     | 95.2      | winter |
| <i>Antigone. a. sharpii</i> | 738,856.3 | 1,874,218.2 | 16.9     | 95.2      | winter |
| <i>Antigone. a. sharpii</i> | 744,155.9 | 1,854,152.9 | 16.8     | 95.3      | winter |
| <i>Antigone. a. sharpii</i> | 744,538.4 | 1,853,821.9 | 16.8     | 95.3      | winter |
| <i>Antigone. a. sharpii</i> | 745,694.1 | 1,875,785.3 | 17       | 95.3      | winter |
| <i>Antigone. a. sharpii</i> | 745,704.9 | 1,875,774.4 | 17       | 95.3      | winter |
| <i>Antigone. a. sharpii</i> | 746,319.6 | 1,868,799.9 | 16.9     | 95.3      | winter |
| <i>Antigone. a. sharpii</i> | 746,343.1 | 1,868,796.9 | 16.9     | 95.3      | winter |
| <i>Antigone. a. sharpii</i> | 751,477.4 | 1,863,479.1 | 16.8     | 95.4      | winter |
| <i>Antigone. a. sharpii</i> | 751,933.4 | 1,862,439.3 | 16.8     | 95.4      | winter |
| <i>Antigone. a. sharpii</i> | 753,934.2 | 1,869,289.2 | 16.9     | 95.4      | winter |
| <i>Antigone. a. sharpii</i> | 761,526   | 1,878,778.7 | 17       | 95.5      | winter |
| <i>Antigone. a. sharpii</i> | 763,104.2 | 1,864,581.1 | 16.8     | 95.5      | winter |
| <i>Antigone. a. sharpii</i> | 770,884.2 | 1,845,894.1 | 16.7     | 95.5      | winter |
| <i>Antigone. a. sharpii</i> | 773,979.9 | 1,838,875.6 | 16.6     | 95.6      | winter |
| <i>Antigone. a. sharpii</i> | 778,222.8 | 1,841,985.7 | 16.6     | 95.6      | winter |
| <i>Antigone. a. sharpii</i> | 778,713.1 | 1,848,811.3 | 16.7     | 95.6      | winter |
| <i>Antigone. a. sharpii</i> | 784,185.3 | 1,856,327.9 | 16.8     | 95.7      | winter |
| <i>Antigone. a. sharpii</i> | 784,592.9 | 1,845,270.2 | 16.7     | 95.7      | winter |
| <i>Antigone. a. sharpii</i> | 785,701.8 | 1,849,568.6 | 16.7     | 95.7      | winter |
| <i>Antigone. a. sharpii</i> | 790,256.8 | 1,867,423.2 | 16.9     | 95.7      | winter |
| <i>Antigone. a. sharpii</i> | 796,235.3 | 1,876,152.2 | 17       | 95.8      | winter |
| <i>Antigone. a. sharpii</i> | 804,913.7 | 1,869,416.3 | 16.9     | 95.9      | winter |
| <i>Antigone. a. sharpii</i> | 804,916.9 | 18,694,123  | 16.9     | 95.9      | winter |
| <i>Antigone. a. sharpii</i> | 807,439.8 | 1,854,797.9 | 16.8     | 95.9      | winter |
| <i>Antigone. a. sharpii</i> | 807,457.6 | 185,834.7   | 16.8     | 95.9      | winter |
| <i>Antigone. a. sharpii</i> | 807,546.5 | 1,854,798.3 | 16.8     | 95.9      | winter |
| <i>Antigone. a. sharpii</i> | 808,146.4 | 1,854,570   | 16.8     | 95.9      | winter |
| <i>Antigone. a. sharpii</i> | 725,860.6 | 1,860,263   | 16.8     | 95.1      | summer |
| <i>Antigone. a. sharpii</i> | 725,899.6 | 1,860,398.5 | 16.8     | 95.1      | summer |
| <i>Antigone. a. sharpii</i> | 725,902.9 | 1,860,288.9 | 16.8     | 95.1      | summer |
| <i>Antigone. a. sharpii</i> | 726,252.1 | 1,860,142.1 | 16.8     | 95.1      | summer |
| <i>Antigone. a. sharpii</i> | 738,856.3 | 1,874,218.2 | 16.9     | 95.2      | summer |
| <i>Antigone. a. sharpii</i> | 744,538.4 | 1,853,821.9 | 16.8     | 95.3      | summer |
| <i>Antigone. a. sharpii</i> | 745,694.1 | 1,875,785.3 | 17       | 95.3      | summer |
| <i>Antigone. a. sharpii</i> | 745,704.9 | 1,875,774.4 | 17       | 95.3      | summer |
| <i>Antigone. a. sharpii</i> | 746,319.6 | 1,868,799.9 | 16.9     | 95.3      | summer |
| <i>Antigone. a. sharpii</i> | 746,343.1 | 1,868,796.9 | 16.9     | 95.3      | summer |
| <i>Antigone. a. sharpii</i> | 750,136.5 | 1,873,113.2 | 16.9     | 95.3      | summer |
| <i>Antigone. a. sharpii</i> | 751,419.7 | 1,870,173.5 | 16.9     | 95.4      | summer |
| <i>Antigone. a. sharpii</i> | 751,477.4 | 1,863,479.1 | 16.8     | 95.4      | summer |
| <i>Antigone. a. sharpii</i> | 752,669.2 | 1,868,562   | 16.9     | 95.4      | summer |
| <i>Antigone. a. sharpii</i> | 756,167.3 | 1,855,082.1 | 16.8     | 95.4      | summer |
| <i>Antigone. a. sharpii</i> | 759,013   | 1,843,211.9 | 16.7     | 95.4      | summer |
| <i>Antigone. a. sharpii</i> | 761,526   | 1,878,778.7 | 17       | 95.5      | summer |

|                             |           |             |      |      |        |
|-----------------------------|-----------|-------------|------|------|--------|
| <i>Antigone. a. sharpii</i> | 763,439.7 | 1,907,746.5 | 17.2 | 95.5 | summer |
| <i>Antigone. a. sharpii</i> | 769,714.4 | 1,861,735.9 | 16.8 | 95.5 | summer |
| <i>Antigone. a. sharpii</i> | 770,884.2 | 1,845,894.1 | 16.7 | 95.5 | summer |
| <i>Antigone. a. sharpii</i> | 773,979.9 | 1,838,875.6 | 16.6 | 95.6 | summer |
| <i>Antigone. a. sharpii</i> | 778,222.8 | 1,841,985.7 | 16.6 | 95.6 | summer |
| <i>Antigone. a. sharpii</i> | 778,713.1 | 1,848,811.3 | 16.7 | 95.6 | summer |
| <i>Antigone. a. sharpii</i> | 783,791.4 | 1,841,248.5 | 16.6 | 95.7 | summer |
| <i>Antigone. a. sharpii</i> | 784,185.3 | 1,856,327.9 | 16.8 | 95.7 | summer |
| <i>Antigone. a. sharpii</i> | 784,600.5 | 1,845,259.2 | 16.8 | 95.7 | summer |
| <i>Antigone. a. sharpii</i> | 790,256.8 | 1,867,423.2 | 16.9 | 95.7 | summer |
| <i>Antigone. a. sharpii</i> | 792,016   | 1,853,726.8 | 16.7 | 95.7 | summer |
| <i>Antigone. a. sharpii</i> | 804913.7  | 1,869,416.3 | 16.9 | 95.9 | summer |
| <i>Antigone. a. sharpii</i> | 804,916.9 | 1,869,413   | 16.9 | 95.9 | summer |
| <i>Antigone. a. sharpii</i> | 807,226.5 | 1,854,794.8 | 16.8 | 95.9 | summer |
| <i>Antigone. a. sharpii</i> | 807,439.8 | 1,854,797.9 | 16.8 | 95.9 | summer |
| <i>Antigone. a. sharpii</i> | 807,457.6 | 1,858,347   | 16.8 | 95.9 | summer |
| <i>Antigone. a. sharpii</i> | 711,950.6 | 1,877,555.8 | 17   | 95   | rainy  |
| <i>Antigone. a. sharpii</i> | 712,199.5 | 1,877,176.5 | 17   | 95   | rainy  |
| <i>Antigone. a. sharpii</i> | 725,694.5 | 1,861,537.6 | 16.8 | 95.1 | rainy  |
| <i>Antigone. a. sharpii</i> | 725,842   | 1,859,606.4 | 16.8 | 95.1 | rainy  |
| <i>Antigone. a. sharpii</i> | 726,118.7 | 1,862,641.4 | 16.8 | 95.1 | rainy  |
| <i>Antigone. a. sharpii</i> | 726,139.4 | 1,860,411   | 16.8 | 95.1 | rainy  |
| <i>Antigone. a. sharpii</i> | 726,252.1 | 1,860,142.1 | 16.8 | 95.1 | rainy  |
| <i>Antigone. a. sharpii</i> | 727,192.6 | 1,859,937.5 | 16.8 | 95.1 | rainy  |
| <i>Antigone. a. sharpii</i> | 731,340   | 1,893,840.4 | 17.1 | 95.2 | rainy  |
| <i>Antigone. a. sharpii</i> | 735,921.1 | 1,862,125.6 | 16.8 | 95.2 | rainy  |
| <i>Antigone. a. sharpii</i> | 736,038.1 | 1,861,667.5 | 16.8 | 95.2 | rainy  |
| <i>Antigone. a. sharpii</i> | 738,118.4 | 1,861,003.4 | 16.8 | 95.2 | rainy  |
| <i>Antigone. a. sharpii</i> | 744,638.7 | 1,853,819.7 | 16.8 | 95.3 | rainy  |
| <i>Antigone. a. sharpii</i> | 752,039.1 | 1,869,012.8 | 16.9 | 95.4 | rainy  |
| <i>Antigone. a. sharpii</i> | 753,117.5 | 1,869,302.6 | 16.9 | 95.4 | rainy  |
| <i>Antigone. a. sharpii</i> | 758,966.3 | 1,844,239.9 | 16.7 | 95.4 | rainy  |
| <i>Antigone. a. sharpii</i> | 759,013   | 1,843,211.9 | 16.7 | 95.4 | rainy  |
| <i>Antigone. a. sharpii</i> | 759,123   | 1,843,207.7 | 16.7 | 95.4 | rainy  |
| <i>Antigone. a. sharpii</i> | 759,508.2 | 1,846,106.7 | 16.7 | 95.4 | rainy  |
| <i>Antigone. a. sharpii</i> | 763,104.2 | 1,864,581.1 | 16.8 | 95.5 | rainy  |
| <i>Antigone. a. sharpii</i> | 763,954.2 | 1,838,513.6 | 16.6 | 95.5 | rainy  |
| <i>Antigone. a. sharpii</i> | 769,587.2 | 1,851,636.7 | 16.7 | 95.5 | rainy  |
| <i>Antigone. a. sharpii</i> | 769,712   | 1,850,794.5 | 16.7 | 95.5 | rainy  |
| <i>Antigone. a. sharpii</i> | 769,956.5 | 1,850,198.6 | 16.7 | 95.5 | rainy  |
| <i>Antigone. a. sharpii</i> | 770,145.3 | 1,847,689.6 | 16.7 | 95.5 | rainy  |
| <i>Antigone. a. sharpii</i> | 770,167.1 | 1,847,647.8 | 16.7 | 95.5 | rainy  |
| <i>Antigone. a. sharpii</i> | 770,725.9 | 1,847,348.2 | 16.7 | 95.5 | rainy  |
| <i>Antigone. a. sharpii</i> | 771,176.2 | 1,848,689.4 | 16.7 | 95.5 | rainy  |
| <i>Antigone. a. sharpii</i> | 771,892.3 | 1,845,516.1 | 16.7 | 95.5 | rainy  |
| <i>Antigone. a. sharpii</i> | 783,904.7 | 1,841,401.7 | 16.6 | 95.7 | rainy  |
| <i>Antigone. a. sharpii</i> | 785,701.8 | 1,849,568.6 | 16.7 | 95.7 | rainy  |
| <i>Antigone. a. sharpii</i> | 787,620.8 | 1,856,558.2 | 16.8 | 95.7 | rainy  |
| <i>Antigone. a. sharpii</i> | 807,439.8 | 1,854,797.9 | 16.8 | 95.9 | rainy  |
| <i>Antigone. a. sharpii</i> | 807,546.5 | 1,854,798.3 | 16.8 | 95.9 | rainy  |

**Table S2.** The Pearson correlation coefficient rank  $r$  statistic between the pair of environmental parameters.

| Parameter | Elevation | Slope  | River  | Road   | Village | Landcover | Bio1   | Bio2   | Bio3   | Bio12  | Bio14  | Bio19  |
|-----------|-----------|--------|--------|--------|---------|-----------|--------|--------|--------|--------|--------|--------|
| Elevation | 1         | -0.474 | -0.011 | -0.025 | 0.122   | 0.495     | -0.039 | 0.137  | -0.234 | 0.122  | -0.04  | -0.21  |
| Slope     | -0.474    | 1      | -0.101 | -0.124 | -0.225  | -0.085    | -0.214 | -0.045 | -0.02  | -0.145 | 0.055  | 0.001  |
| River     | -0.011    | -0.101 | 1      | 0.354  | 0.239   | -0.05     | 0.236  | -0.136 | 0.176  | -0.103 | 0.029  | 0.001  |
| Road      | -0.025    | -0.124 | 0.354  | 1      | 0.166   | -0.071    | -0.248 | 0.07   | 0.271  | -0.34  | -0.345 | 0.244  |
| Village   | 0.122     | -0.225 | 0.239  | 0.166  | 1       | -0.082    | 0.107  | -0.049 | 0.129  | -0.246 | -0.039 | -0.093 |
| Landcover | 0.495     | -0.085 | -0.05  | -0.071 | -0.082  | 1         | 0.054  | -0.151 | -0.032 | 0.022  | -0.244 | -0.225 |
| Bio1      | -0.039    | -0.214 | 0.236  | -0.248 | 0.107   | 0.054     | 1      | -0.158 | -0.045 | 0.1    | -0.029 | -0.13  |
| Bio2      | 0.137     | -0.045 | -0.136 | 0.07   | -0.049  | -0.151    | -0.158 | 1      | -0.133 | -0.162 | 0.159  | 0.078  |
| Bio3      | -0.234    | -0.02  | 0.176  | 0.271  | 0.129   | -0.032    | -0.045 | -0.133 | 1      | -0.475 | -0.047 | -0.026 |
| Bio12     | 0.122     | -0.145 | -0.103 | -0.34  | -0.246  | 0.022     | 0.1    | -0.162 | -0.475 | 1      | 0.062  | 0.053  |
| Bio14     | -0.04     | 0.055  | 0.029  | -0.345 | -0.039  | -0.244    | -0.029 | 0.159  | -0.047 | 0.062  | 1      | 0.331  |
| Bio19     | -0.21     | 0.001  | 0.001  | 0.244  | -0.093  | -0.225    | -0.13  | 0.078  | -0.026 | 0.053  | 0.331  | 1      |

Bio 1 = annual mean temperature (°C); Bio2 = mean diurnal range (hours); Bio3 = isothermality (°C); Bio12 = annual precipitation (mm); Bio14 = precipitation of driest month (mm); Bio19 = precipitation of coldest quarter (mm).
